# Supplementary material for: Ligands that enforce unnatural stereospinomers
Source: Royal Society of Chemistry journal article supplement (doi:10.1039/b802462f), 2008-01-01
Supplement: b802462f.pdf [file b802462f.pdf]

## Ligands that Enforce Unnatural Stereospinomers

Dimitris Maganas, Panayotis Kyritsis, Gabriel Aullón, Santiago Alvarez

### Supporting Information

Atomic coordinates of optimized structures

#### d<sup>4</sup> Ions

Cr<sup>II</sup>(2), S = 0

|    |    |       |        |        |
|----|----|-------|--------|--------|
| 1  | Cr | 4.835 | 0.155  | 1.543  |
| 2  | N  | 4.592 | 0.812  | 3.433  |
| 3  | C  | 5.935 | 0.906  | 4.105  |
| 4  | H  | 5.783 | 1.064  | 5.177  |
| 5  | H  | 6.432 | 1.800  | 3.727  |
| 6  | C  | 6.849 | -0.314 | 3.896  |
| 7  | H  | 6.368 | -1.226 | 4.251  |
| 8  | H  | 7.694 | -0.173 | 4.575  |
| 9  | C  | 7.472 | -0.524 | 2.505  |
| 10 | H  | 7.958 | 0.399  | 2.191  |
| 11 | H  | 8.261 | -1.280 | 2.580  |
| 12 | N  | 6.527 | -0.933 | 1.402  |
| 13 | C  | 7.159 | -0.703 | 0.055  |
| 14 | H  | 6.590 | -1.273 | -0.680 |
| 15 | H  | 8.168 | -1.125 | 0.062  |
| 16 | C  | 7.229 | 0.770  | -0.384 |
| 17 | H  | 7.856 | 0.785  | -1.280 |
| 18 | H  | 7.784 | 1.366  | 0.342  |
| 19 | C  | 5.920 | 1.472  | -0.789 |
| 20 | H  | 6.162 | 2.417  | -1.286 |
| 21 | H  | 5.401 | 0.859  | -1.525 |
| 22 | N  | 4.944 | 1.760  | 0.326  |
| 23 | C  | 3.577 | 2.051  | -0.231 |
| 24 | H  | 3.675 | 2.779  | -1.042 |
| 25 | H  | 2.996 | 2.538  | 0.553  |
| 26 | C  | 2.810 | 0.820  | -0.746 |
| 27 | H  | 1.933 | 1.214  | -1.268 |
| 28 | H  | 3.377 | 0.305  | -1.523 |
| 29 | C  | 2.256 | -0.180 | 0.285  |
| 30 | H  | 1.554 | -0.854 | -0.215 |
| 31 | H  | 1.684 | 0.364  | 1.037  |
| 32 | N  | 3.277 | -1.017 | 1.017  |
| 33 | C  | 2.673 | -1.629 | 2.252  |
| 34 | H  | 3.328 | -2.438 | 2.574  |
| 35 | H  | 1.717 | -2.090 | 1.985  |
| 36 | C  | 2.457 | -0.651 | 3.420  |
| 37 | H  | 1.864 | -1.197 | 4.160  |
| 38 | H  | 1.814 | 0.178  | 3.121  |
| 39 | C  | 3.694 | -0.144 | 4.180  |
| 40 | H  | 3.369 | 0.342  | 5.106  |
| 41 | H  | 4.304 | -0.998 | 4.476  |
| 42 | C  | 3.928 | 2.150  | 3.298  |
| 43 | H  | 3.736 | 2.566  | 4.293  |
| 44 | H  | 2.948 | 1.955  | 2.863  |
| 45 | C  | 4.649 | 3.232  | 2.460  |

|    |   |       |        |        |
|----|---|-------|--------|--------|
| 46 | H | 5.349 | 3.780  | 3.095  |
| 47 | H | 3.875 | 3.961  | 2.214  |
| 48 | C | 5.453 | 2.879  | 1.185  |
| 49 | H | 5.545 | 3.789  | 0.581  |
| 50 | H | 6.470 | 2.605  | 1.467  |
| 51 | C | 6.092 | -2.356 | 1.591  |
| 52 | H | 5.720 | -2.421 | 2.613  |
| 53 | H | 6.966 | -3.015 | 1.547  |
| 54 | C | 5.022 | -2.920 | 0.625  |
| 55 | H | 4.621 | -3.800 | 1.132  |
| 56 | H | 5.508 | -3.316 | -0.269 |
| 57 | C | 3.853 | -2.051 | 0.097  |
| 58 | H | 4.182 | -1.512 | -0.792 |
| 59 | H | 3.057 | -2.724 | -0.240 |

Cr<sup>II</sup>(2), S = 1

|    |    |       |        |        |
|----|----|-------|--------|--------|
| 1  | Cr | 4.829 | 0.157  | 1.535  |
| 2  | N  | 4.590 | 0.920  | 3.415  |
| 3  | C  | 5.951 | 0.932  | 4.057  |
| 4  | H  | 5.825 | 1.112  | 5.130  |
| 5  | H  | 6.496 | 1.788  | 3.658  |
| 6  | C  | 6.789 | -0.349 | 3.864  |
| 7  | H  | 6.249 | -1.228 | 4.218  |
| 8  | H  | 7.631 | -0.253 | 4.556  |
| 9  | C  | 7.424 | -0.618 | 2.489  |
| 10 | H  | 7.947 | 0.279  | 2.162  |
| 11 | H  | 8.184 | -1.398 | 2.598  |
| 12 | N  | 6.484 | -1.029 | 1.378  |
| 13 | C  | 7.096 | -0.712 | 0.038  |
| 14 | H  | 6.506 | -1.225 | -0.723 |
| 15 | H  | 8.098 | -1.151 | 0.006  |
| 16 | C  | 7.201 | 0.788  | -0.312 |
| 17 | H  | 7.850 | 0.834  | -1.192 |
| 18 | H  | 7.753 | 1.332  | 0.456  |
| 19 | C  | 5.925 | 1.553  | -0.712 |
| 20 | H  | 6.214 | 2.503  | -1.173 |
| 21 | H  | 5.400 | 0.986  | -1.478 |
| 22 | N  | 4.940 | 1.849  | 0.397  |
| 23 | C  | 3.559 | 2.046  | -0.172 |
| 24 | H  | 3.619 | 2.796  | -0.968 |
| 25 | H  | 2.937 | 2.477  | 0.614  |
| 26 | C  | 2.878 | 0.779  | -0.735 |
| 27 | H  | 2.009 | 1.143  | -1.292 |
| 28 | H  | 3.502 | 0.303  | -1.494 |
| 29 | C  | 2.317 | -0.269 | 0.245  |
| 30 | H  | 1.647 | -0.939 | -0.303 |
| 31 | H  | 1.704 | 0.239  | 0.988  |
| 32 | N  | 3.327 | -1.117 | 0.986  |
| 33 | C  | 2.724 | -1.645 | 2.261  |
| 34 | H  | 3.384 | -2.426 | 2.639  |
| 35 | H  | 1.772 | -2.129 | 2.019  |
| 36 | C  | 2.478 | -0.594 | 3.365  |
| 37 | H  | 1.857 | -1.098 | 4.111  |
| 38 | H  | 1.847 | 0.218  | 2.998  |
| 39 | C  | 3.680 | -0.039 | 4.151  |
| 40 | H  | 3.309 | 0.467  | 5.047  |

|    |   |       |        |        |
|----|---|-------|--------|--------|
| 41 | H | 4.289 | -0.872 | 4.496  |
| 42 | C | 3.965 | 2.278  | 3.366  |
| 43 | H | 3.870 | 2.671  | 4.384  |
| 44 | H | 2.947 | 2.122  | 3.008  |
| 45 | C | 4.645 | 3.364  | 2.500  |
| 46 | H | 5.360 | 3.919  | 3.111  |
| 47 | H | 3.856 | 4.084  | 2.277  |
| 48 | C | 5.408 | 3.022  | 1.198  |
| 49 | H | 5.413 | 3.916  | 0.564  |
| 50 | H | 6.451 | 2.817  | 1.437  |
| 51 | C | 6.125 | -2.475 | 1.520  |
| 52 | H | 5.817 | -2.602 | 2.558  |
| 53 | H | 7.026 | -3.085 | 1.396  |
| 54 | C | 5.031 | -3.052 | 0.590  |
| 55 | H | 4.656 | -3.935 | 1.111  |
| 56 | H | 5.497 | -3.444 | -0.316 |
| 57 | C | 3.836 | -2.203 | 0.094  |
| 58 | H | 4.109 | -1.714 | -0.841 |
| 59 | H | 3.015 | -2.886 | -0.153 |

Cr<sup>II</sup>(2), S = 2

|    |    |       |        |        |
|----|----|-------|--------|--------|
| 1  | Cr | 4.831 | 0.158  | 1.544  |
| 2  | N  | 4.611 | 0.657  | 3.536  |
| 3  | C  | 5.938 | 0.779  | 4.228  |
| 4  | H  | 5.767 | 0.852  | 5.307  |
| 5  | H  | 6.378 | 1.726  | 3.918  |
| 6  | C  | 6.938 | -0.355 | 3.955  |
| 7  | H  | 6.523 | -1.316 | 4.264  |
| 8  | H  | 7.772 | -0.188 | 4.643  |
| 9  | C  | 7.580 | -0.451 | 2.556  |
| 10 | H  | 8.046 | 0.503  | 2.304  |
| 11 | H  | 8.384 | -1.195 | 2.597  |
| 12 | N  | 6.657 | -0.804 | 1.426  |
| 13 | C  | 7.298 | -0.614 | 0.081  |
| 14 | H  | 6.773 | -1.261 | -0.623 |
| 15 | H  | 8.329 | -0.977 | 0.127  |
| 16 | C  | 7.295 | 0.824  | -0.461 |
| 17 | H  | 7.926 | 0.809  | -1.353 |
| 18 | H  | 7.816 | 1.493  | 0.226  |
| 19 | C  | 5.955 | 1.432  | -0.921 |
| 20 | H  | 6.161 | 2.379  | -1.433 |
| 21 | H  | 5.489 | 0.771  | -1.653 |
| 22 | N  | 4.938 | 1.681  | 0.156  |
| 23 | C  | 3.582 | 2.012  | -0.398 |
| 24 | H  | 3.705 | 2.683  | -1.254 |
| 25 | H  | 3.050 | 2.580  | 0.366  |
| 26 | C  | 2.722 | 0.810  | -0.824 |
| 27 | H  | 1.854 | 1.233  | -1.336 |
| 28 | H  | 3.232 | 0.229  | -1.594 |
| 29 | C  | 2.138 | -0.109 | 0.270  |
| 30 | H  | 1.427 | -0.795 | -0.202 |
| 31 | H  | 1.572 | 0.491  | 0.984  |
| 32 | N  | 3.131 | -0.912 | 1.059  |
| 33 | C  | 2.520 | -1.556 | 2.269  |
| 34 | H  | 3.137 | -2.419 | 2.524  |
| 35 | H  | 1.534 | -1.948 | 2.002  |

|    |   |       |        |        |
|----|---|-------|--------|--------|
| 36 | C | 2.384 | -0.653 | 3.505  |
| 37 | H | 1.788 | -1.221 | 4.225  |
| 38 | H | 1.769 | 0.220  | 3.277  |
| 39 | C | 3.662 | -0.249 | 4.267  |
| 40 | H | 3.367 | 0.235  | 5.204  |
| 41 | H | 4.221 | -1.147 | 4.538  |
| 42 | C | 3.967 | 2.003  | 3.316  |
| 43 | H | 3.805 | 2.479  | 4.290  |
| 44 | H | 2.975 | 1.803  | 2.915  |
| 45 | C | 4.660 | 3.061  | 2.409  |
| 46 | H | 5.379 | 3.627  | 3.006  |
| 47 | H | 3.865 | 3.776  | 2.192  |
| 48 | C | 5.437 | 2.752  | 1.095  |
| 49 | H | 5.513 | 3.695  | 0.543  |
| 50 | H | 6.457 | 2.476  | 1.355  |
| 51 | C | 6.137 | -2.208 | 1.609  |
| 52 | H | 5.794 | -2.268 | 2.640  |
| 53 | H | 6.977 | -2.908 | 1.531  |
| 54 | C | 5.011 | -2.751 | 0.683  |
| 55 | H | 4.638 | -3.629 | 1.215  |
| 56 | H | 5.460 | -3.154 | -0.227 |
| 57 | C | 3.802 | -1.921 | 0.161  |
| 58 | H | 4.120 | -1.371 | -0.723 |
| 59 | H | 3.051 | -2.639 | -0.186 |

Mn<sup>III</sup>(2), S = 0

|    |    |       |        |        |
|----|----|-------|--------|--------|
| 1  | Mn | 4.835 | 0.156  | 1.544  |
| 2  | N  | 4.591 | 0.787  | 3.373  |
| 3  | C  | 5.929 | 0.922  | 4.077  |
| 4  | H  | 5.719 | 1.082  | 5.138  |
| 5  | H  | 6.410 | 1.827  | 3.712  |
| 6  | C  | 6.862 | -0.277 | 3.904  |
| 7  | H  | 6.421 | -1.195 | 4.294  |
| 8  | H  | 7.718 | -0.092 | 4.560  |
| 9  | C  | 7.450 | -0.476 | 2.507  |
| 10 | H  | 7.928 | 0.444  | 2.172  |
| 11 | H  | 8.228 | -1.242 | 2.542  |
| 12 | N  | 6.470 | -0.898 | 1.416  |
| 13 | C  | 7.127 | -0.714 | 0.057  |
| 14 | H  | 6.567 | -1.302 | -0.668 |
| 15 | H  | 8.123 | -1.157 | 0.120  |
| 16 | C  | 7.229 | 0.738  | -0.412 |
| 17 | H  | 7.821 | 0.717  | -1.333 |
| 18 | H  | 7.822 | 1.346  | 0.272  |
| 19 | C  | 5.913 | 1.421  | -0.785 |
| 20 | H  | 6.118 | 2.380  | -1.266 |
| 21 | H  | 5.374 | 0.813  | -1.511 |
| 22 | N  | 4.950 | 1.705  | 0.365  |
| 23 | C  | 3.582 | 2.049  | -0.200 |
| 24 | H  | 3.740 | 2.778  | -0.999 |
| 25 | H  | 3.016 | 2.556  | 0.579  |
| 26 | C  | 2.792 | 0.854  | -0.734 |
| 27 | H  | 1.900 | 1.272  | -1.212 |
| 28 | H  | 3.316 | 0.348  | -1.546 |
| 29 | C  | 2.273 | -0.136 | 0.310  |
| 30 | H  | 1.583 | -0.839 | -0.162 |

|    |   |       |        |        |
|----|---|-------|--------|--------|
| 31 | H | 1.708 | 0.394  | 1.075  |
| 32 | N | 3.329 | -0.971 | 1.026  |
| 33 | C | 2.706 | -1.632 | 2.245  |
| 34 | H | 3.354 | -2.452 | 2.549  |
| 35 | H | 1.763 | -2.078 | 1.921  |
| 36 | C | 2.461 | -0.692 | 3.426  |
| 37 | H | 1.906 | -1.275 | 4.167  |
| 38 | H | 1.784 | 0.122  | 3.165  |
| 39 | C | 3.708 | -0.183 | 4.151  |
| 40 | H | 3.416 | 0.328  | 5.071  |
| 41 | H | 4.334 | -1.025 | 4.444  |
| 42 | C | 3.897 | 2.123  | 3.238  |
| 43 | H | 3.678 | 2.494  | 4.244  |
| 44 | H | 2.929 | 1.923  | 2.779  |
| 45 | C | 4.648 | 3.217  | 2.456  |
| 46 | H | 5.326 | 3.756  | 3.120  |
| 47 | H | 3.892 | 3.954  | 2.180  |
| 48 | C | 5.487 | 2.827  | 1.225  |
| 49 | H | 5.613 | 3.708  | 0.589  |
| 50 | H | 6.493 | 2.533  | 1.527  |
| 51 | C | 6.039 | -2.331 | 1.633  |
| 52 | H | 5.646 | -2.383 | 2.648  |
| 53 | H | 6.934 | -2.958 | 1.626  |
| 54 | C | 5.020 | -2.905 | 0.631  |
| 55 | H | 4.585 | -3.779 | 1.120  |
| 56 | H | 5.535 | -3.309 | -0.242 |
| 57 | C | 3.906 | -1.997 | 0.077  |
| 58 | H | 4.262 | -1.445 | -0.793 |
| 59 | H | 3.085 | -2.623 | -0.283 |

Mn<sup>III</sup>(2), S = 1

|    |    |        |         |         |
|----|----|--------|---------|---------|
| 1  | Mn | 4.8250 | 0.3310  | 1.5950  |
| 2  | N  | 4.5730 | 0.6740  | 3.5270  |
| 3  | C  | 5.8990 | 0.8280  | 4.2390  |
| 4  | H  | 5.7030 | 0.8820  | 5.3120  |
| 5  | H  | 6.3320 | 1.7850  | 3.9490  |
| 6  | C  | 6.8780 | -0.3060 | 3.9340  |
| 7  | H  | 6.4910 | -1.2680 | 4.2720  |
| 8  | H  | 7.7590 | -0.1310 | 4.5580  |
| 9  | C  | 7.4070 | -0.3780 | 2.4960  |
| 10 | H  | 7.8170 | 0.5870  | 2.1990  |
| 11 | H  | 8.2330 | -1.0920 | 2.4580  |
| 12 | N  | 6.4280 | -0.8140 | 1.4010  |
| 13 | C  | 7.0960 | -0.6670 | 0.0430  |
| 14 | H  | 6.5240 | -1.2630 | -0.6650 |
| 15 | H  | 8.0790 | -1.1360 | 0.1300  |
| 16 | C  | 7.2570 | 0.7560  | -0.4910 |
| 17 | H  | 7.8720 | 0.6670  | -1.3920 |
| 18 | H  | 7.8560 | 1.3780  | 0.1760  |
| 19 | C  | 5.9710 | 1.4570  | -0.9300 |
| 20 | H  | 6.2110 | 2.4220  | -1.3850 |
| 21 | H  | 5.4630 | 0.8640  | -1.6890 |
| 22 | N  | 4.9740 | 1.7010  | 0.1750  |
| 23 | C  | 3.6160 | 2.0660  | -0.3810 |
| 24 | H  | 3.7660 | 2.7180  | -1.2450 |
| 25 | H  | 3.0870 | 2.6530  | 0.3690  |

|    |   |        |         |         |
|----|---|--------|---------|---------|
| 26 | C | 2.7820 | 0.8450  | -0.7760 |
| 27 | H | 1.8680 | 1.2310  | -1.2380 |
| 28 | H | 3.2650 | 0.2720  | -1.5680 |
| 29 | C | 2.3080 | -0.0550 | 0.3710  |
| 30 | H | 1.5680 | -0.7600 | -0.0150 |
| 31 | H | 1.8030 | 0.5390  | 1.1320  |
| 32 | N | 3.3640 | -0.9080 | 1.0840  |
| 33 | C | 2.7290 | -1.5980 | 2.2810  |
| 34 | H | 3.3850 | -2.4160 | 2.5680  |
| 35 | H | 1.8010 | -2.0500 | 1.9200  |
| 36 | C | 2.4290 | -0.7240 | 3.4980  |
| 37 | H | 1.8570 | -1.3550 | 4.1840  |
| 38 | H | 1.7460 | 0.0920  | 3.2570  |
| 39 | C | 3.6450 | -0.2390 | 4.2880  |
| 40 | H | 3.3170 | 0.2890  | 5.1870  |
| 41 | H | 4.2390 | -1.0910 | 4.6180  |
| 42 | C | 3.8930 | 2.0060  | 3.2340  |
| 43 | H | 3.6020 | 2.4560  | 4.1870  |
| 44 | H | 2.9500 | 1.7630  | 2.7380  |
| 45 | C | 4.6590 | 3.0820  | 2.4160  |
| 46 | H | 5.3460 | 3.6230  | 3.0700  |
| 47 | H | 3.8960 | 3.8150  | 2.1500  |
| 48 | C | 5.5090 | 2.7310  | 1.1630  |
| 49 | H | 5.6990 | 3.6590  | 0.6170  |
| 50 | H | 6.4970 | 2.3780  | 1.4710  |
| 51 | C | 6.0300 | -2.2510 | 1.6380  |
| 52 | H | 5.6430 | -2.2990 | 2.6530  |
| 53 | H | 6.9400 | -2.8570 | 1.6260  |
| 54 | C | 5.0160 | -2.8480 | 0.6520  |
| 55 | H | 4.5890 | -3.7210 | 1.1490  |
| 56 | H | 5.5250 | -3.2530 | -0.2240 |
| 57 | C | 3.9060 | -1.9330 | 0.1190  |
| 58 | H | 4.2550 | -1.3830 | -0.7520 |
| 59 | H | 3.0680 | -2.5470 | -0.2220 |

Mn<sup>III</sup>(2), S = 2

|    |    |       |        |        |
|----|----|-------|--------|--------|
| 1  | Mn | 4.832 | 0.158  | 1.543  |
| 2  | N  | 4.608 | 0.643  | 3.492  |
| 3  | C  | 5.938 | 0.802  | 4.199  |
| 4  | H  | 5.730 | 0.882  | 5.269  |
| 5  | H  | 6.361 | 1.755  | 3.887  |
| 6  | C  | 6.952 | -0.320 | 3.960  |
| 7  | H  | 6.569 | -1.282 | 4.301  |
| 8  | H  | 7.790 | -0.112 | 4.631  |
| 9  | C  | 7.568 | -0.416 | 2.558  |
| 10 | H  | 8.035 | 0.530  | 2.284  |
| 11 | H  | 8.360 | -1.170 | 2.570  |
| 12 | N  | 6.618 | -0.782 | 1.438  |
| 13 | C  | 7.267 | -0.629 | 0.078  |
| 14 | H  | 6.744 | -1.290 | -0.611 |
| 15 | H  | 8.291 | -1.004 | 0.162  |
| 16 | C  | 7.290 | 0.794  | -0.487 |
| 17 | H  | 7.894 | 0.745  | -1.398 |
| 18 | H  | 7.845 | 1.471  | 0.165  |
| 19 | C  | 5.946 | 1.393  | -0.921 |
| 20 | H  | 6.127 | 2.349  | -1.420 |

|    |   |       |        |        |
|----|---|-------|--------|--------|
| 21 | H | 5.460 | 0.741  | -1.648 |
| 22 | N | 4.944 | 1.646  | 0.185  |
| 23 | C | 3.580 | 2.015  | -0.362 |
| 24 | H | 3.740 | 2.689  | -1.208 |
| 25 | H | 3.064 | 2.589  | 0.406  |
| 26 | C | 2.704 | 0.840  | -0.808 |
| 27 | H | 1.828 | 1.286  | -1.285 |
| 28 | H | 3.181 | 0.269  | -1.606 |
| 29 | C | 2.147 | -0.076 | 0.292  |
| 30 | H | 1.445 | -0.783 | -0.159 |
| 31 | H | 1.586 | 0.508  | 1.022  |
| 32 | N | 3.168 | -0.884 | 1.062  |
| 33 | C | 2.555 | -1.568 | 2.265  |
| 34 | H | 3.172 | -2.434 | 2.500  |
| 35 | H | 1.577 | -1.950 | 1.961  |
| 36 | C | 2.394 | -0.693 | 3.512  |
| 37 | H | 1.831 | -1.297 | 4.230  |
| 38 | H | 1.746 | 0.162  | 3.317  |
| 39 | C | 3.677 | -0.281 | 4.247  |
| 40 | H | 3.405 | 0.223  | 5.179  |
| 41 | H | 4.256 | -1.164 | 4.520  |
| 42 | C | 3.930 | 1.985  | 3.253  |
| 43 | H | 3.711 | 2.423  | 4.232  |
| 44 | H | 2.961 | 1.765  | 2.807  |
| 45 | C | 4.662 | 3.056  | 2.407  |
| 46 | H | 5.362 | 3.609  | 3.037  |
| 47 | H | 3.886 | 3.784  | 2.161  |
| 48 | C | 5.477 | 2.709  | 1.137  |
| 49 | H | 5.611 | 3.629  | 0.561  |
| 50 | H | 6.480 | 2.391  | 1.421  |
| 51 | C | 6.075 | -2.187 | 1.657  |
| 52 | H | 5.682 | -2.206 | 2.673  |
| 53 | H | 6.926 | -2.875 | 1.657  |
| 54 | C | 5.012 | -2.743 | 0.680  |
| 55 | H | 4.609 | -3.622 | 1.186  |
| 56 | H | 5.500 | -3.142 | -0.212 |
| 57 | C | 3.853 | -1.875 | 0.132  |
| 58 | H | 4.202 | -1.299 | -0.725 |
| 59 | H | 3.084 | -2.548 | -0.260 |

Mo<sup>II</sup>(2), S = 0

|    |    |       |        |        |
|----|----|-------|--------|--------|
| 1  | Mo | 4.837 | 0.153  | 1.542  |
| 2  | N  | 4.585 | 0.851  | 3.506  |
| 3  | C  | 5.954 | 0.902  | 4.139  |
| 4  | H  | 5.843 | 1.054  | 5.217  |
| 5  | H  | 6.456 | 1.791  | 3.753  |
| 6  | C  | 6.845 | -0.341 | 3.898  |
| 7  | H  | 6.333 | -1.246 | 4.231  |
| 8  | H  | 7.679 | -0.234 | 4.599  |
| 9  | C  | 7.512 | -0.572 | 2.521  |
| 10 | H  | 8.011 | 0.345  | 2.206  |
| 11 | H  | 8.296 | -1.328 | 2.634  |
| 12 | N  | 6.594 | -0.989 | 1.394  |
| 13 | C  | 7.191 | -0.701 | 0.039  |
| 14 | H  | 6.615 | -1.265 | -0.696 |
| 15 | H  | 8.209 | -1.103 | 0.006  |

|    |   |       |        |        |
|----|---|-------|--------|--------|
| 16 | C | 7.231 | 0.792  | -0.368 |
| 17 | H | 7.886 | 0.830  | -1.244 |
| 18 | H | 7.763 | 1.378  | 0.385  |
| 19 | C | 5.938 | 1.518  | -0.809 |
| 20 | H | 6.213 | 2.450  | -1.313 |
| 21 | H | 5.419 | 0.909  | -1.550 |
| 22 | N | 4.943 | 1.832  | 0.285  |
| 23 | C | 3.554 | 2.064  | -0.259 |
| 24 | H | 3.609 | 2.789  | -1.078 |
| 25 | H | 2.973 | 2.539  | 0.533  |
| 26 | C | 2.812 | 0.801  | -0.761 |
| 27 | H | 1.944 | 1.181  | -1.310 |
| 28 | H | 3.402 | 0.287  | -1.521 |
| 29 | C | 2.224 | -0.216 | 0.249  |
| 30 | H | 1.524 | -0.870 | -0.281 |
| 31 | H | 1.639 | 0.319  | 0.997  |
| 32 | N | 3.222 | -1.074 | 0.993  |
| 33 | C | 2.642 | -1.641 | 2.265  |
| 34 | H | 3.303 | -2.445 | 2.593  |
| 35 | H | 1.678 | -2.108 | 2.041  |
| 36 | C | 2.449 | -0.625 | 3.417  |
| 37 | H | 1.826 | -1.144 | 4.153  |
| 38 | H | 1.829 | 0.211  | 3.089  |
| 39 | C | 3.668 | -0.115 | 4.221  |
| 40 | H | 3.309 | 0.356  | 5.142  |
| 41 | H | 4.277 | -0.967 | 4.528  |
| 42 | C | 3.947 | 2.201  | 3.358  |
| 43 | H | 3.790 | 2.650  | 4.345  |
| 44 | H | 2.951 | 2.009  | 2.957  |
| 45 | C | 4.650 | 3.269  | 2.470  |
| 46 | H | 5.366 | 3.826  | 3.079  |
| 47 | H | 3.862 | 3.993  | 2.250  |
| 48 | C | 5.428 | 2.952  | 1.158  |
| 49 | H | 5.483 | 3.880  | 0.576  |
| 50 | H | 6.459 | 2.701  | 1.411  |
| 51 | C | 6.138 | -2.409 | 1.558  |
| 52 | H | 5.791 | -2.485 | 2.589  |
| 53 | H | 6.995 | -3.088 | 1.480  |
| 54 | C | 5.026 | -2.955 | 0.614  |
| 55 | H | 4.647 | -3.839 | 1.131  |
| 56 | H | 5.489 | -3.349 | -0.293 |
| 57 | C | 3.820 | -2.115 | 0.094  |
| 58 | H | 4.125 | -1.581 | -0.806 |
| 59 | H | 3.044 | -2.821 | -0.227 |

Mo<sup>II</sup>(2), S = 1

|    |    |       |        |       |
|----|----|-------|--------|-------|
| 1  | Mo | 4.819 | 0.406  | 1.622 |
| 2  | N  | 4.530 | 0.738  | 3.694 |
| 3  | C  | 5.896 | 0.767  | 4.321 |
| 4  | H  | 5.798 | 0.774  | 5.410 |
| 5  | H  | 6.367 | 1.713  | 4.049 |
| 6  | C  | 6.807 | -0.408 | 3.902 |
| 7  | H  | 6.332 | -1.356 | 4.159 |
| 8  | H  | 7.676 | -0.350 | 4.563 |
| 9  | C  | 7.410 | -0.462 | 2.471 |
| 10 | H  | 7.822 | 0.514  | 2.215 |



|    |   |       |        |        |
|----|---|-------|--------|--------|
| 11 | H | 8.254 | -1.159 | 2.495  |
| 12 | N | 6.502 | -0.881 | 1.328  |
| 13 | C | 7.165 | -0.641 | -0.005 |
| 14 | H | 6.596 | -1.206 | -0.744 |
| 15 | H | 8.167 | -1.082 | 0.024  |
| 16 | C | 7.291 | 0.824  | -0.467 |
| 17 | H | 7.972 | 0.799  | -1.323 |
| 18 | H | 7.824 | 1.418  | 0.278  |
| 19 | C | 6.039 | 1.569  | -0.969 |
| 20 | H | 6.348 | 2.511  | -1.435 |
| 21 | H | 5.554 | 0.978  | -1.747 |
| 22 | N | 5.002 | 1.840  | 0.074  |
| 23 | C | 3.618 | 2.056  | -0.472 |
| 24 | H | 3.673 | 2.675  | -1.372 |
| 25 | H | 3.058 | 2.635  | 0.265  |
| 26 | C | 2.855 | 0.754  | -0.800 |
| 27 | H | 1.961 | 1.073  | -1.344 |
| 28 | H | 3.417 | 0.166  | -1.526 |
| 29 | C | 2.311 | -0.145 | 0.343  |
| 30 | H | 1.559 | -0.812 | -0.091 |
| 31 | H | 1.791 | 0.474  | 1.074  |
| 32 | N | 3.302 | -1.009 | 1.106  |
| 33 | C | 2.662 | -1.610 | 2.330  |
| 34 | H | 3.316 | -2.417 | 2.663  |
| 35 | H | 1.716 | -2.076 | 2.034  |
| 36 | C | 2.385 | -0.656 | 3.508  |
| 37 | H | 1.737 | -1.218 | 4.188  |
| 38 | H | 1.764 | 0.183  | 3.187  |
| 39 | C | 3.556 | -0.168 | 4.382  |
| 40 | H | 3.154 | 0.332  | 5.270  |
| 41 | H | 4.128 | -1.027 | 4.736  |
| 42 | C | 3.946 | 2.107  | 3.412  |
| 43 | H | 3.815 | 2.651  | 4.351  |
| 44 | H | 2.939 | 1.923  | 3.036  |
| 45 | C | 4.668 | 3.135  | 2.433  |
| 46 | H | 5.403 | 3.689  | 3.019  |
| 47 | H | 3.868 | 3.852  | 2.238  |
| 48 | C | 5.444 | 2.902  | 1.061  |
| 49 | H | 5.450 | 3.878  | 0.567  |
| 50 | H | 6.487 | 2.680  | 1.287  |
| 51 | C | 6.148 | -2.327 | 1.506  |
| 52 | H | 5.869 | -2.434 | 2.551  |
| 53 | H | 7.046 | -2.938 | 1.362  |
| 54 | C | 5.020 | -2.922 | 0.636  |
| 55 | H | 4.668 | -3.796 | 1.187  |
| 56 | H | 5.442 | -3.328 | -0.285 |
| 57 | C | 3.818 | -2.071 | 0.181  |
| 58 | H | 4.089 | -1.554 | -0.735 |
| 59 | H | 2.999 | -2.752 | -0.077 |

Mo<sup>II</sup>(2), S = 2

|   |    |        |        |        |
|---|----|--------|--------|--------|
| 1 | Mo | 4.9040 | 0.2880 | 1.5460 |
| 2 | N  | 4.7740 | 0.6160 | 3.6910 |
| 3 | C  | 6.0460 | 0.2360 | 4.4150 |
| 4 | H  | 5.8080 | 0.0400 | 5.4630 |
| 5 | H  | 6.7080 | 1.1010 | 4.4020 |

|    |   |        |         |         |
|----|---|--------|---------|---------|
| 6  | C | 6.8050 | -0.9710 | 3.8370  |
| 7  | H | 6.1670 | -1.8560 | 3.7980  |
| 8  | H | 7.5670 | -1.2150 | 4.5830  |
| 9  | C | 7.5770 | -0.7770 | 2.5150  |
| 10 | H | 8.0870 | 0.1880  | 2.5360  |
| 11 | H | 8.3520 | -1.5470 | 2.4480  |
| 12 | N | 6.7690 | -0.8230 | 1.2440  |
| 13 | C | 7.5550 | -0.2330 | 0.0910  |
| 14 | H | 7.2390 | -0.7440 | -0.8170 |
| 15 | H | 8.6120 | -0.4730 | 0.2340  |
| 16 | C | 7.4070 | 1.2840  | -0.1260 |
| 17 | H | 8.2400 | 1.5770  | -0.7700 |
| 18 | H | 7.5740 | 1.8240  | 0.8100  |
| 19 | C | 6.1340 | 1.7830  | -0.8410 |
| 20 | H | 6.3120 | 2.7920  | -1.2280 |
| 21 | H | 5.9250 | 1.1440  | -1.7000 |
| 22 | N | 4.8920 | 1.8040  | 0.0050  |
| 23 | C | 3.6240 | 1.8260  | -0.8130 |
| 24 | H | 3.8360 | 2.3280  | -1.7600 |
| 25 | H | 2.9020 | 2.4510  | -0.2870 |
| 26 | C | 2.9930 | 0.4530  | -1.0940 |
| 27 | H | 2.2600 | 0.6170  | -1.8880 |
| 28 | H | 3.7330 | -0.2210 | -1.5330 |
| 29 | C | 2.2190 | -0.2370 | 0.0500  |
| 30 | H | 1.5450 | -0.9840 | -0.3840 |
| 31 | H | 1.5880 | 0.4990  | 0.5540  |
| 32 | N | 3.0550 | -0.9040 | 1.1040  |
| 33 | C | 2.2510 | -1.1920 | 2.3460  |
| 34 | H | 2.6050 | -2.1370 | 2.7590  |
| 35 | H | 1.2110 | -1.3570 | 2.0530  |
| 36 | C | 2.3010 | -0.1250 | 3.4530  |
| 37 | H | 1.4980 | -0.3840 | 4.1490  |
| 38 | H | 2.0200 | 0.8570  | 3.0660  |
| 39 | C | 3.5760 | -0.0480 | 4.3150  |
| 40 | H | 3.3430 | 0.4780  | 5.2470  |
| 41 | H | 3.8810 | -1.0590 | 4.5880  |
| 42 | C | 4.6110 | 2.1370  | 3.5930  |
| 43 | H | 5.5850 | 2.5790  | 3.7940  |
| 44 | H | 3.9470 | 2.4500  | 4.4020  |
| 45 | C | 4.0520 | 2.7960  | 2.2810  |
| 46 | H | 3.8590 | 3.8230  | 2.6060  |
| 47 | H | 3.0600 | 2.4150  | 2.0280  |
| 48 | C | 4.9200 | 2.9640  | 0.9910  |
| 49 | H | 4.5710 | 3.8560  | 0.4650  |
| 50 | H | 5.9570 | 3.1480  | 1.2670  |
| 51 | C | 6.3190 | -2.2460 | 0.9170  |
| 52 | H | 7.0360 | -2.9330 | 1.3730  |
| 53 | H | 6.4140 | -2.3730 | -0.1600 |
| 54 | C | 4.8990 | -2.7150 | 1.3240  |
| 55 | H | 4.7460 | -2.6460 | 2.4020  |
| 56 | H | 4.9210 | -3.7910 | 1.1230  |
| 57 | C | 3.6600 | -2.1810 | 0.5660  |
| 58 | H | 3.9160 | -2.0180 | -0.4800 |
| 59 | H | 2.8820 | -2.9510 | 0.5780  |

|    |    |       |        |        |
|----|----|-------|--------|--------|
| 1  | Fe | 4.835 | 0.156  | 1.545  |
| 2  | N  | 4.585 | 0.781  | 3.354  |
| 3  | C  | 5.932 | 0.934  | 4.061  |
| 4  | H  | 5.689 | 1.092  | 5.117  |
| 5  | H  | 6.399 | 1.848  | 3.704  |
| 6  | C  | 6.873 | -0.255 | 3.913  |
| 7  | H  | 6.459 | -1.176 | 4.326  |
| 8  | H  | 7.735 | -0.041 | 4.556  |
| 9  | C  | 7.443 | -0.444 | 2.513  |
| 10 | H  | 7.916 | 0.470  | 2.161  |
| 11 | H  | 8.217 | -1.217 | 2.529  |
| 12 | N  | 6.453 | -0.890 | 1.424  |
| 13 | C  | 7.107 | -0.720 | 0.051  |
| 14 | H  | 6.553 | -1.323 | -0.664 |
| 15 | H  | 8.100 | -1.173 | 0.146  |
| 16 | C  | 7.232 | 0.720  | -0.430 |
| 17 | H  | 7.805 | 0.677  | -1.364 |
| 18 | H  | 7.848 | 1.334  | 0.228  |
| 19 | C  | 5.911 | 1.386  | -0.790 |
| 20 | H  | 6.098 | 2.354  | -1.264 |
| 21 | H  | 5.356 | 0.783  | -1.506 |
| 22 | N  | 4.956 | 1.690  | 0.378  |
| 23 | C  | 3.578 | 2.050  | -0.180 |
| 24 | H  | 3.769 | 2.779  | -0.975 |
| 25 | H  | 3.024 | 2.570  | 0.598  |
| 26 | C  | 2.778 | 0.876  | -0.730 |
| 27 | H  | 1.878 | 1.309  | -1.182 |
| 28 | H  | 3.275 | 0.378  | -1.563 |
| 29 | C  | 2.277 | -0.104 | 0.323  |
| 30 | H  | 1.592 | -0.824 | -0.137 |
| 31 | H  | 1.718 | 0.412  | 1.100  |
| 32 | N  | 3.346 | -0.958 | 1.024  |
| 33 | C  | 2.727 | -1.638 | 2.247  |
| 34 | H  | 3.371 | -2.465 | 2.535  |
| 35 | H  | 1.788 | -2.075 | 1.890  |
| 36 | C  | 2.460 | -0.717 | 3.431  |
| 37 | H  | 1.927 | -1.324 | 4.171  |
| 38 | H  | 1.760 | 0.085  | 3.194  |
| 39 | C  | 3.712 | -0.214 | 4.137  |
| 40 | H  | 3.435 | 0.312  | 5.056  |
| 41 | H  | 4.354 | -1.044 | 4.428  |
| 42 | C  | 3.876 | 2.114  | 3.198  |
| 43 | H  | 3.637 | 2.463  | 4.210  |
| 44 | H  | 2.914 | 1.908  | 2.729  |
| 45 | C  | 4.648 | 3.214  | 2.455  |
| 46 | H  | 5.313 | 3.749  | 3.136  |
| 47 | H  | 3.905 | 3.959  | 2.163  |
| 48 | C  | 5.510 | 2.800  | 1.254  |
| 49 | H  | 5.659 | 3.667  | 0.601  |
| 50 | H  | 6.511 | 2.494  | 1.561  |
| 51 | C  | 6.002 | -2.321 | 1.659  |
| 52 | H  | 5.600 | -2.363 | 2.672  |
| 53 | H  | 6.908 | -2.936 | 1.679  |
| 54 | C  | 5.019 | -2.902 | 0.632  |
| 55 | H  | 4.564 | -3.773 | 1.108  |
| 56 | H  | 5.552 | -3.312 | -0.228 |
| 57 | C  | 3.943 | -1.968 | 0.061  |

|    |   |       |        |        |
|----|---|-------|--------|--------|
| 58 | H | 4.309 | -1.406 | -0.799 |
| 59 | H | 3.109 | -2.569 | -0.318 |

Fe<sup>IV</sup>(2), S = 1

|    |    |       |        |        |
|----|----|-------|--------|--------|
| 1  | Fe | 4.825 | 0.334  | 1.595  |
| 2  | N  | 4.618 | 0.710  | 3.530  |
| 3  | C  | 5.943 | 0.857  | 4.240  |
| 4  | H  | 5.735 | 0.918  | 5.313  |
| 5  | H  | 6.387 | 1.807  | 3.944  |
| 6  | C  | 6.909 | -0.302 | 3.976  |
| 7  | H  | 6.518 | -1.253 | 4.341  |
| 8  | H  | 7.789 | -0.115 | 4.601  |
| 9  | C  | 7.445 | -0.406 | 2.547  |
| 10 | H  | 7.882 | 0.535  | 2.217  |
| 11 | H  | 8.257 | -1.146 | 2.541  |
| 12 | N  | 6.497 | -0.878 | 1.449  |
| 13 | C  | 7.087 | -0.668 | 0.060  |
| 14 | H  | 6.517 | -1.280 | -0.634 |
| 15 | H  | 8.089 | -1.112 | 0.124  |
| 16 | C  | 7.224 | 0.763  | -0.466 |
| 17 | H  | 7.833 | 0.674  | -1.373 |
| 18 | H  | 7.828 | 1.391  | 0.189  |
| 19 | C  | 5.928 | 1.443  | -0.913 |
| 20 | H  | 6.168 | 2.403  | -1.381 |
| 21 | H  | 5.417 | 0.844  | -1.667 |
| 22 | N  | 4.926 | 1.725  | 0.189  |
| 23 | C  | 3.569 | 2.084  | -0.369 |
| 24 | H  | 3.730 | 2.742  | -1.229 |
| 25 | H  | 3.030 | 2.662  | 0.381  |
| 26 | C  | 2.748 | 0.867  | -0.811 |
| 27 | H  | 1.834 | 1.264  | -1.265 |
| 28 | H  | 3.232 | 0.316  | -1.619 |
| 29 | C  | 2.271 | -0.056 | 0.313  |
| 30 | H  | 1.544 | -0.762 | -0.112 |
| 31 | H  | 1.745 | 0.501  | 1.088  |
| 32 | N  | 3.297 | -0.943 | 1.007  |
| 33 | C  | 2.737 | -1.589 | 2.266  |
| 34 | H  | 3.393 | -2.414 | 2.531  |
| 35 | H  | 1.787 | -2.035 | 1.940  |
| 36 | C  | 2.462 | -0.702 | 3.481  |
| 37 | H  | 1.896 | -1.336 | 4.174  |
| 38 | H  | 1.772 | 0.112  | 3.255  |
| 39 | C  | 3.690 | -0.237 | 4.266  |
| 40 | H  | 3.362 | 0.280  | 5.175  |
| 41 | H  | 4.289 | -1.089 | 4.588  |
| 42 | C  | 3.907 | 2.031  | 3.223  |
| 43 | H  | 3.589 | 2.453  | 4.185  |
| 44 | H  | 2.971 | 1.767  | 2.722  |
| 45 | C  | 4.656 | 3.120  | 2.427  |
| 46 | H  | 5.343 | 3.667  | 3.077  |
| 47 | H  | 3.890 | 3.854  | 2.163  |
| 48 | C  | 5.493 | 2.740  | 1.187  |
| 49 | H  | 5.719 | 3.652  | 0.621  |
| 50 | H  | 6.473 | 2.359  | 1.490  |
| 51 | C  | 6.022 | -2.286 | 1.663  |
| 52 | H  | 5.647 | -2.342 | 2.683  |

|    |   |       |        |        |
|----|---|-------|--------|--------|
| 53 | H | 6.918 | -2.922 | 1.643  |
| 54 | C | 5.017 | -2.860 | 0.649  |
| 55 | H | 4.577 | -3.734 | 1.135  |
| 56 | H | 5.536 | -3.271 | -0.220 |
| 57 | C | 3.919 | -1.945 | 0.078  |
| 58 | H | 4.263 | -1.395 | -0.797 |
| 59 | H | 3.101 | -2.585 | -0.280 |

Fe<sup>IV</sup>(2), S = 2

|    |    |       |        |        |
|----|----|-------|--------|--------|
| 1  | Fe | 4.832 | 0.157  | 1.541  |
| 2  | N  | 4.602 | 0.696  | 3.478  |
| 3  | C  | 5.949 | 0.847  | 4.159  |
| 4  | H  | 5.740 | 0.935  | 5.232  |
| 5  | H  | 6.380 | 1.792  | 3.836  |
| 6  | C  | 6.941 | -0.303 | 3.948  |
| 7  | H  | 6.552 | -1.251 | 4.323  |
| 8  | H  | 7.789 | -0.085 | 4.607  |
| 9  | C  | 7.540 | -0.428 | 2.545  |
| 10 | H  | 8.025 | 0.499  | 2.238  |
| 11 | H  | 8.323 | -1.197 | 2.571  |
| 12 | N  | 6.594 | -0.833 | 1.429  |
| 13 | C  | 7.220 | -0.658 | 0.057  |
| 14 | H  | 6.689 | -1.307 | -0.635 |
| 15 | H  | 8.244 | -1.040 | 0.140  |
| 16 | C  | 7.275 | 0.777  | -0.480 |
| 17 | H  | 7.862 | 0.723  | -1.403 |
| 18 | H  | 7.861 | 1.433  | 0.167  |
| 19 | C  | 5.936 | 1.398  | -0.888 |
| 20 | H  | 6.135 | 2.362  | -1.374 |
| 21 | H  | 5.422 | 0.778  | -1.623 |
| 22 | N  | 4.946 | 1.687  | 0.228  |
| 23 | C  | 3.567 | 2.031  | -0.307 |
| 24 | H  | 3.729 | 2.712  | -1.151 |
| 25 | H  | 3.043 | 2.592  | 0.465  |
| 26 | C  | 2.717 | 0.848  | -0.787 |
| 27 | H  | 1.831 | 1.293  | -1.252 |
| 28 | H  | 3.198 | 0.306  | -1.603 |
| 29 | C  | 2.177 | -0.088 | 0.298  |
| 30 | H  | 1.485 | -0.798 | -0.171 |
| 31 | H  | 1.602 | 0.461  | 1.044  |
| 32 | N  | 3.198 | -0.928 | 1.045  |
| 33 | C  | 2.602 | -1.598 | 2.270  |
| 34 | H  | 3.224 | -2.457 | 2.514  |
| 35 | H  | 1.624 | -1.983 | 1.961  |
| 36 | C  | 2.412 | -0.702 | 3.499  |
| 37 | H  | 1.865 | -1.313 | 4.226  |
| 38 | H  | 1.738 | 0.132  | 3.296  |
| 39 | C  | 3.688 | -0.262 | 4.222  |
| 40 | H  | 3.402 | 0.252  | 5.148  |
| 41 | H  | 4.292 | -1.121 | 4.516  |
| 42 | C  | 3.904 | 2.033  | 3.219  |
| 43 | H  | 3.641 | 2.438  | 4.205  |
| 44 | H  | 2.950 | 1.798  | 2.745  |
| 45 | C  | 4.658 | 3.116  | 2.427  |
| 46 | H  | 5.343 | 3.662  | 3.081  |
| 47 | H  | 3.896 | 3.854  | 2.163  |

|    |   |       |        |        |
|----|---|-------|--------|--------|
| 48 | C | 5.497 | 2.743  | 1.190  |
| 49 | H | 5.662 | 3.647  | 0.590  |
| 50 | H | 6.492 | 2.408  | 1.483  |
| 51 | C | 6.035 | -2.238 | 1.667  |
| 52 | H | 5.625 | -2.238 | 2.678  |
| 53 | H | 6.901 | -2.911 | 1.708  |
| 54 | C | 5.015 | -2.802 | 0.663  |
| 55 | H | 4.590 | -3.681 | 1.156  |
| 56 | H | 5.524 | -3.208 | -0.214 |
| 57 | C | 3.896 | -1.907 | 0.100  |
| 58 | H | 4.259 | -1.316 | -0.743 |
| 59 | H | 3.109 | -2.547 | -0.318 |

Re<sup>III</sup>(2), S = 0

|    |    |        |         |         |
|----|----|--------|---------|---------|
| 1  | Re | 4.8340 | 0.1530  | 1.5420  |
| 2  | N  | 4.5830 | 0.8330  | 3.4600  |
| 3  | C  | 5.9550 | 0.9120  | 4.1240  |
| 4  | H  | 5.7930 | 1.0620  | 5.1940  |
| 5  | H  | 6.4460 | 1.8120  | 3.7520  |
| 6  | C  | 6.8570 | -0.3190 | 3.9070  |
| 7  | H  | 6.3770 | -1.2290 | 4.2710  |
| 8  | H  | 7.7010 | -0.1780 | 4.5900  |
| 9  | C  | 7.5010 | -0.5420 | 2.5260  |
| 10 | H  | 8.0010 | 0.3680  | 2.1970  |
| 11 | H  | 8.2710 | -1.3130 | 2.6050  |
| 12 | N  | 6.5500 | -0.9620 | 1.4020  |
| 13 | C  | 7.1770 | -0.7050 | 0.0340  |
| 14 | H  | 6.6130 | -1.2850 | -0.6980 |
| 15 | H  | 8.1860 | -1.1220 | 0.0530  |
| 16 | C  | 7.2400 | 0.7760  | -0.3900 |
| 17 | H  | 7.8720 | 0.7910  | -1.2840 |
| 18 | H  | 7.8000 | 1.3690  | 0.3350  |
| 19 | C  | 5.9410 | 1.4910  | -0.8120 |
| 20 | H  | 6.1890 | 2.4420  | -1.2890 |
| 21 | H  | 5.4110 | 0.8960  | -1.5540 |
| 22 | N  | 4.9490 | 1.7920  | 0.3140  |
| 23 | C  | 3.5540 | 2.0630  | -0.2430 |
| 24 | H  | 3.6610 | 2.7860  | -1.0560 |
| 25 | H  | 2.9810 | 2.5580  | 0.5410  |
| 26 | C  | 2.8000 | 0.8210  | -0.7570 |
| 27 | H  | 1.9230 | 1.2160  | -1.2810 |
| 28 | H  | 3.3640 | 0.3130  | -1.5400 |
| 29 | C  | 2.2280 | -0.1880 | 0.2600  |
| 30 | H  | 1.5450 | -0.8700 | -0.2500 |
| 31 | H  | 1.6430 | 0.3350  | 1.0170  |
| 32 | N  | 3.2580 | -1.0440 | 1.0010  |
| 33 | C  | 2.6570 | -1.6460 | 2.2690  |
| 34 | H  | 3.3100 | -2.4610 | 2.5840  |
| 35 | H  | 1.7010 | -2.0980 | 1.9960  |
| 36 | C  | 2.4450 | -0.6510 | 3.4270  |
| 37 | H  | 1.8480 | -1.1960 | 4.1660  |
| 38 | H  | 1.7980 | 0.1730  | 3.1250  |
| 39 | C  | 3.6710 | -0.1410 | 4.2090  |
| 40 | H  | 3.3380 | 0.3600  | 5.1210  |
| 41 | H  | 4.2900 | -0.9820 | 4.5210  |
| 42 | C  | 3.9260 | 2.1920  | 3.3230  |

|    |   |        |         |         |
|----|---|--------|---------|---------|
| 43 | H | 3.7600 | 2.6020  | 4.3230  |
| 44 | H | 2.9340 | 1.9990  | 2.9120  |
| 45 | C | 4.6490 | 3.2680  | 2.4710  |
| 46 | H | 5.3530 | 3.8180  | 3.0980  |
| 47 | H | 3.8720 | 3.9960  | 2.2330  |
| 48 | C | 5.4510 | 2.9280  | 1.1850  |
| 49 | H | 5.5160 | 3.8310  | 0.5720  |
| 50 | H | 6.4790 | 2.6710  | 1.4460  |
| 51 | C | 6.1050 | -2.4010 | 1.5790  |
| 52 | H | 5.7530 | -2.4730 | 2.6090  |
| 53 | H | 6.9850 | -3.0480 | 1.5170  |
| 54 | C | 5.0250 | -2.9540 | 0.6120  |
| 55 | H | 4.6320 | -3.8380 | 1.1190  |
| 56 | H | 5.5050 | -3.3470 | -0.2860 |
| 57 | C | 3.8440 | -2.0950 | 0.0810  |
| 58 | H | 4.1510 | -1.5600 | -0.8190 |
| 59 | H | 3.0430 | -2.7700 | -0.2320 |

Re<sup>III</sup>(2), S = 1

|    |    |        |         |         |
|----|----|--------|---------|---------|
| 1  | Re | 4.8220 | 0.3610  | 1.6080  |
| 2  | N  | 4.5280 | 0.7140  | 3.6350  |
| 3  | C  | 5.8940 | 0.7850  | 4.2990  |
| 4  | H  | 5.7480 | 0.7990  | 5.3810  |
| 5  | H  | 6.3450 | 1.7420  | 4.0320  |
| 6  | C  | 6.8290 | -0.3740 | 3.9120  |
| 7  | H  | 6.3990 | -1.3330 | 4.2060  |
| 8  | H  | 7.7080 | -0.2670 | 4.5560  |
| 9  | C  | 7.4110 | -0.4300 | 2.4790  |
| 10 | H  | 7.8240 | 0.5390  | 2.2020  |
| 11 | H  | 8.2430 | -1.1380 | 2.4740  |
| 12 | N  | 6.4760 | -0.8650 | 1.3330  |
| 13 | C  | 7.1560 | -0.6480 | -0.0140 |
| 14 | H  | 6.5900 | -1.2250 | -0.7450 |
| 15 | H  | 8.1470 | -1.1040 | 0.0540  |
| 16 | C  | 7.3020 | 0.8060  | -0.4860 |
| 17 | H  | 7.9600 | 0.7600  | -1.3590 |
| 18 | H  | 7.8660 | 1.4030  | 0.2330  |
| 19 | C  | 6.0430 | 1.5420  | -0.9640 |
| 20 | H  | 6.3220 | 2.5030  | -1.4040 |
| 21 | H  | 5.5460 | 0.9650  | -1.7440 |
| 22 | N  | 5.0120 | 1.7910  | 0.1110  |
| 23 | C  | 3.6230 | 2.0600  | -0.4480 |
| 24 | H  | 3.7270 | 2.6830  | -1.3390 |
| 25 | H  | 3.0790 | 2.6540  | 0.2870  |
| 26 | C  | 2.8350 | 0.7840  | -0.7920 |
| 27 | H  | 1.9310 | 1.1290  | -1.3030 |
| 28 | H  | 3.3590 | 0.1970  | -1.5480 |
| 29 | C  | 2.3080 | -0.1100 | 0.3550  |
| 30 | H  | 1.5650 | -0.7970 | -0.0570 |
| 31 | H  | 1.7950 | 0.4970  | 1.1010  |
| 32 | N  | 3.3240 | -0.9910 | 1.1120  |
| 33 | C  | 2.6710 | -1.6200 | 2.3370  |
| 34 | H  | 3.3230 | -2.4330 | 2.6550  |
| 35 | H  | 1.7360 | -2.0750 | 2.0000  |
| 36 | C  | 2.3780 | -0.6840 | 3.5180  |
| 37 | H  | 1.7570 | -1.2700 | 4.2030  |

|    |   |        |         |         |
|----|---|--------|---------|---------|
| 38 | H | 1.7270 | 0.1410  | 3.2210  |
| 39 | C | 3.5600 | -0.1910 | 4.3630  |
| 40 | H | 3.1890 | 0.3400  | 5.2440  |
| 41 | H | 4.1430 | -1.0400 | 4.7220  |
| 42 | C | 3.9160 | 2.0940  | 3.3580  |
| 43 | H | 3.7540 | 2.5950  | 4.3160  |
| 44 | H | 2.9170 | 1.9000  | 2.9600  |
| 45 | C | 4.6620 | 3.1390  | 2.4330  |
| 46 | H | 5.3790 | 3.6890  | 3.0440  |
| 47 | H | 3.8720 | 3.8580  | 2.2090  |
| 48 | C | 5.4750 | 2.8670  | 1.1020  |
| 49 | H | 5.5190 | 3.8220  | 0.5710  |
| 50 | H | 6.5100 | 2.6240  | 1.3480  |
| 51 | C | 6.1160 | -2.3220 | 1.5320  |
| 52 | H | 5.8170 | -2.4120 | 2.5730  |
| 53 | H | 7.0280 | -2.9120 | 1.4170  |
| 54 | C | 5.0210 | -2.9190 | 0.6300  |
| 55 | H | 4.6580 | -3.7990 | 1.1650  |
| 56 | H | 5.4630 | -3.3170 | -0.2850 |
| 57 | C | 3.8360 | -2.0540 | 0.1640  |
| 58 | H | 4.1060 | -1.5310 | -0.7490 |
| 59 | H | 2.9990 | -2.7110 | -0.0880 |

Re<sup>III</sup>(2), S = 2

|    |    |        |         |         |
|----|----|--------|---------|---------|
| 1  | Re | 4.8280 | 0.1600  | 1.5430  |
| 2  | N  | 4.6140 | 0.6380  | 3.5910  |
| 3  | C  | 5.9640 | 0.7170  | 4.2910  |
| 4  | H  | 5.7720 | 0.7440  | 5.3660  |
| 5  | H  | 6.4040 | 1.6770  | 4.0220  |
| 6  | C  | 6.9530 | -0.4180 | 3.9820  |
| 7  | H  | 6.5350 | -1.3860 | 4.2610  |
| 8  | H  | 7.7800 | -0.2770 | 4.6850  |
| 9  | C  | 7.6240 | -0.4670 | 2.5940  |
| 10 | H  | 8.0940 | 0.4900  | 2.3660  |
| 11 | H  | 8.4160 | -1.2210 | 2.6140  |
| 12 | N  | 6.7110 | -0.7950 | 1.4230  |
| 13 | C  | 7.3690 | -0.5620 | 0.0710  |
| 14 | H  | 6.8760 | -1.2270 | -0.6380 |
| 15 | H  | 8.4060 | -0.8940 | 0.1520  |
| 16 | C  | 7.3370 | 0.8810  | -0.4540 |
| 17 | H  | 7.9920 | 0.8850  | -1.3310 |
| 18 | H  | 7.8300 | 1.5590  | 0.2450  |
| 19 | C  | 6.0000 | 1.4600  | -0.9590 |
| 20 | H  | 6.1940 | 2.4190  | -1.4470 |
| 21 | H  | 5.5590 | 0.8010  | -1.7060 |
| 22 | N  | 4.9370 | 1.6960  | 0.1020  |
| 23 | C  | 3.5620 | 1.9910  | -0.4850 |
| 24 | H  | 3.7130 | 2.6210  | -1.3650 |
| 25 | H  | 3.0280 | 2.5950  | 0.2490  |
| 26 | C  | 2.7170 | 0.7680  | -0.8790 |
| 27 | H  | 1.8610 | 1.1750  | -1.4250 |
| 28 | H  | 3.2380 | 0.1630  | -1.6250 |
| 29 | C  | 2.0960 | -0.1090 | 0.2290  |
| 30 | H  | 1.3960 | -0.8120 | -0.2320 |
| 31 | H  | 1.5250 | 0.5070  | 0.9240  |
| 32 | N  | 3.0760 | -0.9190 | 1.0620  |



|    |   |        |         |         |
|----|---|--------|---------|---------|
| 33 | C | 2.4450 | -1.5280 | 2.3070  |
| 34 | H | 3.0350 | -2.4110 | 2.5550  |
| 35 | H | 1.4480 | -1.8780 | 2.0290  |
| 36 | C | 2.3380 | -0.6070 | 3.5310  |
| 37 | H | 1.7150 | -1.1520 | 4.2470  |
| 38 | H | 1.7510 | 0.2840  | 3.2980  |
| 39 | C | 3.6180 | -0.2540 | 4.3140  |
| 40 | H | 3.3360 | 0.2540  | 5.2410  |
| 41 | H | 4.1540 | -1.1610 | 4.5930  |
| 42 | C | 4.0100 | 2.0340  | 3.3900  |
| 43 | H | 3.9670 | 2.5110  | 4.3730  |
| 44 | H | 2.9780 | 1.8710  | 3.0890  |
| 45 | C | 4.6650 | 3.0760  | 2.4150  |
| 46 | H | 5.4080 | 3.6500  | 2.9710  |
| 47 | H | 3.8480 | 3.7790  | 2.2410  |
| 48 | C | 5.3920 | 2.8140  | 1.0490  |
| 49 | H | 5.3440 | 3.7500  | 0.4860  |
| 50 | H | 6.4460 | 2.6310  | 1.2390  |
| 51 | C | 6.1910 | -2.2320 | 1.5560  |
| 52 | H | 5.9190 | -2.3530 | 2.6020  |
| 53 | H | 7.0400 | -2.8990 | 1.3840  |
| 54 | C | 5.0190 | -2.7610 | 0.6600  |
| 55 | H | 4.7100 | -3.6620 | 1.1940  |
| 56 | H | 5.4380 | -3.1290 | -0.2790 |
| 57 | C | 3.7290 | -1.9970 | 0.1900  |
| 58 | H | 3.9310 | -1.5250 | -0.7680 |
| 59 | H | 2.9670 | -2.7570 | -0.0030 |

Ru<sup>IV</sup>(2), S = 0

|    |    |       |        |        |
|----|----|-------|--------|--------|
| 1  | Ru | 4.834 | 0.155  | 1.543  |
| 2  | N  | 4.582 | 0.817  | 3.432  |
| 3  | C  | 5.952 | 0.924  | 4.101  |
| 4  | H  | 5.751 | 1.073  | 5.167  |
| 5  | H  | 6.428 | 1.834  | 3.740  |
| 6  | C  | 6.868 | -0.291 | 3.914  |
| 7  | H  | 6.423 | -1.207 | 4.307  |
| 8  | H  | 7.722 | -0.114 | 4.578  |
| 9  | C  | 7.482 | -0.493 | 2.526  |
| 10 | H  | 7.970 | 0.417  | 2.181  |
| 11 | H  | 8.253 | -1.267 | 2.576  |
| 12 | N  | 6.523 | -0.940 | 1.410  |
| 13 | C  | 7.150 | -0.712 | 0.032  |
| 14 | H  | 6.592 | -1.307 | -0.690 |
| 15 | H  | 8.154 | -1.144 | 0.090  |
| 16 | C  | 7.242 | 0.752  | -0.413 |
| 17 | H  | 7.842 | 0.737  | -1.331 |
| 18 | H  | 7.837 | 1.356  | 0.273  |
| 19 | C  | 5.933 | 1.444  | -0.810 |
| 20 | H  | 6.155 | 2.406  | -1.282 |
| 21 | H  | 5.387 | 0.851  | -1.542 |
| 22 | N  | 4.953 | 1.763  | 0.331  |
| 23 | C  | 3.557 | 2.061  | -0.218 |
| 24 | H  | 3.706 | 2.784  | -1.027 |
| 25 | H  | 2.995 | 2.573  | 0.561  |

|    |   |       |        |        |
|----|---|-------|--------|--------|
| 26 | C | 2.787 | 0.847  | -0.749 |
| 27 | H | 1.897 | 1.262  | -1.237 |
| 28 | H | 3.314 | 0.346  | -1.562 |
| 29 | C | 2.242 | -0.145 | 0.285  |
| 30 | H | 1.560 | -0.847 | -0.205 |
| 31 | H | 1.668 | 0.369  | 1.053  |
| 32 | N | 3.281 | -1.018 | 1.007  |
| 33 | C | 2.684 | -1.647 | 2.267  |
| 34 | H | 3.331 | -2.470 | 2.565  |
| 35 | H | 1.732 | -2.089 | 1.954  |
| 36 | C | 2.447 | -0.681 | 3.433  |
| 37 | H | 1.882 | -1.258 | 4.175  |
| 38 | H | 1.768 | 0.131  | 3.167  |
| 39 | C | 3.685 | -0.180 | 4.183  |
| 40 | H | 3.377 | 0.335  | 5.098  |
| 41 | H | 4.318 | -1.013 | 4.488  |
| 42 | C | 3.897 | 2.162  | 3.263  |
| 43 | H | 3.689 | 2.544  | 4.268  |
| 44 | H | 2.920 | 1.954  | 2.823  |
| 45 | C | 4.648 | 3.248  | 2.466  |
| 46 | H | 5.334 | 3.793  | 3.119  |
| 47 | H | 3.886 | 3.986  | 2.202  |
| 48 | C | 5.483 | 2.872  | 1.223  |
| 49 | H | 5.594 | 3.761  | 0.592  |
| 50 | H | 6.499 | 2.585  | 1.502  |
| 51 | C | 6.057 | -2.371 | 1.617  |
| 52 | H | 5.689 | -2.427 | 2.643  |
| 53 | H | 6.951 | -3.005 | 1.593  |
| 54 | C | 5.022 | -2.936 | 0.621  |
| 55 | H | 4.602 | -3.815 | 1.115  |
| 56 | H | 5.526 | -3.339 | -0.261 |
| 57 | C | 3.892 | -2.042 | 0.067  |
| 58 | H | 4.220 | -1.490 | -0.816 |
| 59 | H | 3.074 | -2.684 | -0.278 |

Ru<sup>IV</sup>(2), S = 1

|    |    |       |        |        |
|----|----|-------|--------|--------|
| 1  | Ru | 4.820 | 0.334  | 1.596  |
| 2  | N  | 4.560 | 0.716  | 3.609  |
| 3  | C  | 5.916 | 0.824  | 4.288  |
| 4  | H  | 5.733 | 0.851  | 5.366  |
| 5  | H  | 6.356 | 1.783  | 4.016  |
| 6  | C  | 6.865 | -0.331 | 3.947  |
| 7  | H  | 6.471 | -1.292 | 4.279  |
| 8  | H  | 7.753 | -0.180 | 4.572  |
| 9  | C  | 7.410 | -0.391 | 2.512  |
| 10 | H  | 7.818 | 0.570  | 2.202  |
| 11 | H  | 8.237 | -1.108 | 2.480  |
| 12 | N  | 6.459 | -0.867 | 1.381  |
| 13 | C  | 7.112 | -0.663 | 0.007  |
| 14 | H  | 6.542 | -1.260 | -0.703 |
| 15 | H  | 8.101 | -1.126 | 0.093  |
| 16 | C  | 7.271 | 0.775  | -0.492 |
| 17 | H  | 7.899 | 0.695  | -1.387 |
| 18 | H  | 7.872 | 1.384  | 0.185  |
| 19 | C  | 6.001 | 1.493  | -0.956 |
| 20 | H  | 6.267 | 2.458  | -1.401 |

|    |   |       |        |        |
|----|---|-------|--------|--------|
| 21 | H | 5.488 | 0.918  | -1.726 |
| 22 | N | 4.982 | 1.778  | 0.129  |
| 23 | C | 3.599 | 2.085  | -0.424 |
| 24 | H | 3.739 | 2.719  | -1.304 |
| 25 | H | 3.064 | 2.681  | 0.316  |
| 26 | C | 2.798 | 0.833  | -0.803 |
| 27 | H | 1.881 | 1.201  | -1.278 |
| 28 | H | 3.289 | 0.259  | -1.590 |
| 29 | C | 2.304 | -0.061 | 0.345  |
| 30 | H | 1.566 | -0.767 | -0.051 |
| 31 | H | 1.798 | 0.522  | 1.113  |
| 32 | N | 3.336 | -0.968 | 1.070  |
| 33 | C | 2.711 | -1.616 | 2.311  |
| 34 | H | 3.364 | -2.438 | 2.599  |
| 35 | H | 1.775 | -2.061 | 1.957  |
| 36 | C | 2.414 | -0.709 | 3.507  |
| 37 | H | 1.826 | -1.329 | 4.194  |
| 38 | H | 1.732 | 0.104  | 3.251  |
| 39 | C | 3.613 | -0.227 | 4.329  |
| 40 | H | 3.260 | 0.300  | 5.221  |
| 41 | H | 4.212 | -1.071 | 4.673  |
| 42 | C | 3.900 | 2.061  | 3.292  |
| 43 | H | 3.661 | 2.536  | 4.252  |
| 44 | H | 2.925 | 1.828  | 2.854  |
| 45 | C | 4.656 | 3.125  | 2.428  |
| 46 | H | 5.355 | 3.677  | 3.060  |
| 47 | H | 3.878 | 3.850  | 2.179  |
| 48 | C | 5.496 | 2.800  | 1.148  |
| 49 | H | 5.640 | 3.745  | 0.609  |
| 50 | H | 6.507 | 2.483  | 1.419  |
| 51 | C | 6.058 | -2.311 | 1.601  |
| 52 | H | 5.720 | -2.382 | 2.633  |
| 53 | H | 6.978 | -2.903 | 1.539  |
| 54 | C | 5.021 | -2.905 | 0.636  |
| 55 | H | 4.615 | -3.783 | 1.145  |
| 56 | H | 5.508 | -3.309 | -0.255 |
| 57 | C | 3.887 | -2.007 | 0.115  |
| 58 | H | 4.191 | -1.473 | -0.782 |
| 59 | H | 3.041 | -2.639 | -0.177 |

Ru<sup>IV</sup>(2), S = 2

|    |    |       |        |        |
|----|----|-------|--------|--------|
| 1  | Ru | 4.820 | 0.334  | 1.596  |
| 2  | N  | 4.560 | 0.716  | 3.609  |
| 3  | C  | 5.916 | 0.824  | 4.288  |
| 4  | H  | 5.733 | 0.851  | 5.366  |
| 5  | H  | 6.356 | 1.783  | 4.016  |
| 6  | C  | 6.865 | -0.331 | 3.947  |
| 7  | H  | 6.471 | -1.292 | 4.279  |
| 8  | H  | 7.753 | -0.180 | 4.572  |
| 9  | C  | 7.410 | -0.391 | 2.512  |
| 10 | H  | 7.818 | 0.570  | 2.202  |
| 11 | H  | 8.237 | -1.108 | 2.480  |
| 12 | N  | 6.459 | -0.867 | 1.381  |
| 13 | C  | 7.112 | -0.663 | 0.007  |
| 14 | H  | 6.542 | -1.260 | -0.703 |
| 15 | H  | 8.101 | -1.126 | 0.093  |

|    |   |       |        |        |
|----|---|-------|--------|--------|
| 16 | C | 7.271 | 0.775  | -0.492 |
| 17 | H | 7.899 | 0.695  | -1.387 |
| 18 | H | 7.872 | 1.384  | 0.185  |
| 19 | C | 6.001 | 1.493  | -0.956 |
| 20 | H | 6.267 | 2.458  | -1.401 |
| 21 | H | 5.488 | 0.918  | -1.726 |
| 22 | N | 4.982 | 1.778  | 0.129  |
| 23 | C | 3.599 | 2.085  | -0.424 |
| 24 | H | 3.739 | 2.719  | -1.304 |
| 25 | H | 3.064 | 2.681  | 0.316  |
| 26 | C | 2.798 | 0.833  | -0.803 |
| 27 | H | 1.881 | 1.201  | -1.278 |
| 28 | H | 3.289 | 0.259  | -1.590 |
| 29 | C | 2.304 | -0.061 | 0.345  |
| 30 | H | 1.566 | -0.767 | -0.051 |
| 31 | H | 1.798 | 0.522  | 1.113  |
| 32 | N | 3.336 | -0.968 | 1.070  |
| 33 | C | 2.711 | -1.616 | 2.311  |
| 34 | H | 3.364 | -2.438 | 2.599  |
| 35 | H | 1.775 | -2.061 | 1.957  |
| 36 | C | 2.414 | -0.709 | 3.507  |
| 37 | H | 1.826 | -1.329 | 4.194  |
| 38 | H | 1.732 | 0.104  | 3.251  |
| 39 | C | 3.613 | -0.227 | 4.329  |
| 40 | H | 3.260 | 0.300  | 5.221  |
| 41 | H | 4.212 | -1.071 | 4.673  |
| 42 | C | 3.900 | 2.061  | 3.292  |
| 43 | H | 3.661 | 2.536  | 4.252  |
| 44 | H | 2.925 | 1.828  | 2.854  |
| 45 | C | 4.656 | 3.125  | 2.428  |
| 46 | H | 5.355 | 3.677  | 3.060  |
| 47 | H | 3.878 | 3.850  | 2.179  |
| 48 | C | 5.496 | 2.800  | 1.148  |
| 49 | H | 5.640 | 3.745  | 0.609  |
| 50 | H | 6.507 | 2.483  | 1.419  |
| 51 | C | 6.058 | -2.311 | 1.601  |
| 52 | H | 5.720 | -2.382 | 2.633  |
| 53 | H | 6.978 | -2.903 | 1.539  |
| 54 | C | 5.021 | -2.905 | 0.636  |
| 55 | H | 4.615 | -3.783 | 1.145  |
| 56 | H | 5.508 | -3.309 | -0.255 |
| 57 | C | 3.887 | -2.007 | 0.115  |
| 58 | H | 4.191 | -1.473 | -0.782 |
| 59 | H | 3.041 | -2.639 | -0.177 |

### **d<sup>8</sup> Ions**

Cu<sup>III</sup>(2), S = 0

|   |    |        |         |        |
|---|----|--------|---------|--------|
| 1 | Cu | 4.8330 | 0.1600  | 1.5430 |
| 2 | N  | 4.6030 | 0.5950  | 3.4920 |
| 3 | C  | 5.9210 | 0.7830  | 4.1880 |
| 4 | H  | 5.7100 | 0.8530  | 5.2600 |
| 5 | H  | 6.3240 | 1.7440  | 3.8770 |
| 6 | C  | 6.9700 | -0.3080 | 3.9660 |
| 7 | H  | 6.6170 | -1.2810 | 4.3080 |
| 8 | H  | 7.8010 | -0.0680 | 4.6350 |

|    |   |        |         |         |
|----|---|--------|---------|---------|
| 9  | C | 7.5710 | -0.3740 | 2.5610  |
| 10 | H | 8.0320 | 0.5780  | 2.2940  |
| 11 | H | 8.3740 | -1.1210 | 2.5640  |
| 12 | N | 6.6290 | -0.7410 | 1.4590  |
| 13 | C | 7.2630 | -0.6150 | 0.1020  |
| 14 | H | 6.7400 | -1.2920 | -0.5710 |
| 15 | H | 8.2900 | -0.9820 | 0.1930  |
| 16 | C | 7.2940 | 0.7880  | -0.5070 |
| 17 | H | 7.8880 | 0.7070  | -1.4210 |
| 18 | H | 7.8510 | 1.4850  | 0.1190  |
| 19 | C | 5.9400 | 1.3540  | -0.9380 |
| 20 | H | 6.1110 | 2.3090  | -1.4480 |
| 21 | H | 5.4610 | 0.6940  | -1.6640 |
| 22 | N | 4.9530 | 1.6060  | 0.1580  |
| 23 | C | 3.6000 | 1.9950  | -0.3690 |
| 24 | H | 3.7660 | 2.6570  | -1.2250 |
| 25 | H | 3.1040 | 2.5830  | 0.3990  |
| 26 | C | 2.6830 | 0.8490  | -0.8060 |
| 27 | H | 1.8100 | 1.3220  | -1.2640 |
| 28 | H | 3.1280 | 0.2640  | -1.6110 |
| 29 | C | 2.1400 | -0.0350 | 0.3160  |
| 30 | H | 1.4220 | -0.7410 | -0.1170 |
| 31 | H | 1.5890 | 0.5610  | 1.0450  |
| 32 | N | 3.1530 | -0.8380 | 1.0690  |
| 33 | C | 2.5580 | -1.5430 | 2.2540  |
| 34 | H | 3.1740 | -2.4150 | 2.4650  |
| 35 | H | 1.5740 | -1.9130 | 1.9480  |
| 36 | C | 2.3940 | -0.7130 | 3.5290  |
| 37 | H | 1.8450 | -1.3450 | 4.2320  |
| 38 | H | 1.7400 | 0.1450  | 3.3670  |
| 39 | C | 3.6900 | -0.3230 | 4.2400  |
| 40 | H | 3.4310 | 0.1730  | 5.1830  |
| 41 | H | 4.2650 | -1.2110 | 4.5050  |
| 42 | C | 3.9180 | 1.9250  | 3.2160  |
| 43 | H | 3.6710 | 2.3620  | 4.1900  |
| 44 | H | 2.9660 | 1.6940  | 2.7460  |
| 45 | C | 4.6620 | 2.9960  | 2.3880  |
| 46 | H | 5.3530 | 3.5490  | 3.0270  |
| 47 | H | 3.8930 | 3.7270  | 2.1320  |
| 48 | C | 5.4930 | 2.6390  | 1.1370  |
| 49 | H | 5.6580 | 3.5590  | 0.5660  |
| 50 | H | 6.4800 | 2.2960  | 1.4380  |
| 51 | C | 6.0520 | -2.1290 | 1.6890  |
| 52 | H | 5.6390 | -2.1290 | 2.6950  |
| 53 | H | 6.8980 | -2.8250 | 1.7150  |
| 54 | C | 5.0080 | -2.6810 | 0.6970  |
| 55 | H | 4.5920 | -3.5600 | 1.1950  |
| 56 | H | 5.5050 | -3.0860 | -0.1870 |
| 57 | C | 3.8710 | -1.8020 | 0.1370  |
| 58 | H | 4.2420 | -1.2080 | -0.6950 |
| 59 | H | 3.1060 | -2.4630 | -0.2880 |

Cu<sup>III</sup>(2), S = 1

|   |    |        |        |        |
|---|----|--------|--------|--------|
| 1 | Cu | 4.8350 | 0.1060 | 1.5260 |
| 2 | N  | 4.5060 | 0.7560 | 3.4300 |
| 3 | C  | 5.8790 | 0.8680 | 4.0550 |

|    |   |        |         |         |
|----|---|--------|---------|---------|
| 4  | H | 5.7130 | 1.0000  | 5.1290  |
| 5  | H | 6.3310 | 1.7880  | 3.6940  |
| 6  | C | 6.8430 | -0.3040 | 3.8450  |
| 7  | H | 6.4150 | -1.2440 | 4.1960  |
| 8  | H | 7.6740 | -0.1200 | 4.5330  |
| 9  | C | 7.4950 | -0.4450 | 2.4640  |
| 10 | H | 7.9600 | 0.4960  | 2.1740  |
| 11 | H | 8.2980 | -1.1870 | 2.5290  |
| 12 | N | 6.5980 | -0.8770 | 1.3250  |
| 13 | C | 7.2440 | -0.6740 | -0.0040 |
| 14 | H | 6.7020 | -1.2710 | -0.7370 |
| 15 | H | 8.2600 | -1.0810 | 0.0530  |
| 16 | C | 7.3240 | 0.7870  | -0.4620 |
| 17 | H | 7.9140 | 0.7860  | -1.3820 |
| 18 | H | 7.9040 | 1.3950  | 0.2330  |
| 19 | C | 5.9910 | 1.4490  | -0.8210 |
| 20 | H | 6.2020 | 2.4140  | -1.2950 |
| 21 | H | 5.4620 | 0.8450  | -1.5570 |
| 22 | N | 5.0360 | 1.7190  | 0.3050  |
| 23 | C | 3.6380 | 1.9990  | -0.2070 |
| 24 | H | 3.7550 | 2.7100  | -1.0320 |
| 25 | H | 3.0980 | 2.5200  | 0.5790  |
| 26 | C | 2.8180 | 0.8030  | -0.6990 |
| 27 | H | 1.9490 | 1.2390  | -1.2030 |
| 28 | H | 3.3340 | 0.2590  | -1.4910 |
| 29 | C | 2.2290 | -0.1400 | 0.3600  |
| 30 | H | 1.5110 | -0.8090 | -0.1270 |
| 31 | H | 1.6720 | 0.4320  | 1.0990  |
| 32 | N | 3.2050 | -1.0200 | 1.1080  |
| 33 | C | 2.5850 | -1.6460 | 2.3120  |
| 34 | H | 3.2140 | -2.4820 | 2.6190  |
| 35 | H | 1.6180 | -2.0660 | 2.0120  |
| 36 | C | 2.3620 | -0.6900 | 3.4880  |
| 37 | H | 1.8070 | -1.2550 | 4.2410  |
| 38 | H | 1.6980 | 0.1330  | 3.2200  |
| 39 | C | 3.6260 | -0.1890 | 4.1930  |
| 40 | H | 3.3260 | 0.3310  | 5.1100  |
| 41 | H | 4.2430 | -1.0340 | 4.4990  |
| 42 | C | 3.8670 | 2.1030  | 3.2350  |
| 43 | H | 3.6590 | 2.5130  | 4.2300  |
| 44 | H | 2.8950 | 1.9230  | 2.7780  |
| 45 | C | 4.6530 | 3.1710  | 2.4430  |
| 46 | H | 5.3230 | 3.7090  | 3.1160  |
| 47 | H | 3.9070 | 3.9150  | 2.1590  |
| 48 | C | 5.5230 | 2.8110  | 1.2170  |
| 49 | H | 5.6350 | 3.7160  | 0.6100  |
| 50 | H | 6.5280 | 2.5320  | 1.5280  |
| 51 | C | 6.0950 | -2.2770 | 1.5700  |
| 52 | H | 5.7380 | -2.2950 | 2.5980  |
| 53 | H | 6.9660 | -2.9430 | 1.5480  |
| 54 | C | 5.0200 | -2.8660 | 0.6420  |
| 55 | H | 4.6500 | -3.7490 | 1.1670  |
| 56 | H | 5.4760 | -3.2590 | -0.2690 |
| 57 | C | 3.8420 | -2.0010 | 0.1570  |
| 58 | H | 4.1490 | -1.4250 | -0.7140 |
| 59 | H | 3.0510 | -2.6720 | -0.1980 |

Ag<sup>III</sup>(2), S = 0

|    |    |        |         |         |
|----|----|--------|---------|---------|
| 1  | Ag | 4.8290 | 0.2110  | 1.5630  |
| 2  | N  | 4.6060 | 0.6220  | 3.6360  |
| 3  | C  | 5.9540 | 0.7270  | 4.2830  |
| 4  | H  | 5.7920 | 0.7500  | 5.3660  |
| 5  | H  | 6.3700 | 1.6950  | 4.0050  |
| 6  | C  | 6.9770 | -0.3840 | 3.9840  |
| 7  | H  | 6.5940 | -1.3580 | 4.2890  |
| 8  | H  | 7.8070 | -0.1980 | 4.6720  |
| 9  | C  | 7.6250 | -0.4370 | 2.5870  |
| 10 | H  | 8.0970 | 0.5160  | 2.3460  |
| 11 | H  | 8.4280 | -1.1840 | 2.6280  |
| 12 | N  | 6.7340 | -0.7980 | 1.4440  |
| 13 | C  | 7.3290 | -0.5910 | 0.0850  |
| 14 | H  | 6.8180 | -1.2660 | -0.5990 |
| 15 | H  | 8.3730 | -0.9190 | 0.1350  |
| 16 | C  | 7.3140 | 0.8380  | -0.4870 |
| 17 | H  | 7.9490 | 0.7980  | -1.3770 |
| 18 | H  | 7.8330 | 1.5300  | 0.1790  |
| 19 | C  | 5.9750 | 1.4170  | -0.9830 |
| 20 | H  | 6.1940 | 2.3590  | -1.5020 |
| 21 | H  | 5.5190 | 0.7530  | -1.7190 |
| 22 | N  | 4.9430 | 1.7060  | 0.0540  |
| 23 | C  | 3.5680 | 1.9970  | -0.4710 |
| 24 | H  | 3.6890 | 2.6270  | -1.3590 |
| 25 | H  | 3.0590 | 2.6010  | 0.2790  |
| 26 | C  | 2.6840 | 0.7980  | -0.8640 |
| 27 | H  | 1.8160 | 1.2380  | -1.3630 |
| 28 | H  | 3.1610 | 0.2000  | -1.6410 |
| 29 | C  | 2.0920 | -0.0850 | 0.2530  |
| 30 | H  | 1.3830 | -0.7760 | -0.2200 |
| 31 | H  | 1.5180 | 0.5190  | 0.9570  |
| 32 | N  | 3.0550 | -0.9040 | 1.0460  |
| 33 | C  | 2.4860 | -1.5370 | 2.2780  |
| 34 | H  | 3.0920 | -2.4140 | 2.5020  |
| 35 | H  | 1.4840 | -1.9000 | 2.0240  |
| 36 | C  | 2.3610 | -0.6560 | 3.5350  |
| 37 | H  | 1.7640 | -1.2440 | 4.2380  |
| 38 | H  | 1.7470 | 0.2220  | 3.3350  |
| 39 | C  | 3.6420 | -0.2950 | 4.3130  |
| 40 | H  | 3.3330 | 0.1860  | 5.2500  |
| 41 | H  | 4.1910 | -1.1960 | 4.5900  |
| 42 | C  | 3.9790 | 1.9830  | 3.3460  |
| 43 | H  | 3.8520 | 2.4830  | 4.3130  |
| 44 | H  | 2.9760 | 1.7800  | 2.9830  |
| 45 | C  | 4.6630 | 3.0240  | 2.3960  |
| 46 | H  | 5.3930 | 3.5980  | 2.9710  |
| 47 | H  | 3.8560 | 3.7330  | 2.2030  |
| 48 | C  | 5.4260 | 2.7500  | 1.0570  |
| 49 | H  | 5.4640 | 3.7050  | 0.5210  |
| 50 | H  | 6.4580 | 2.4960  | 1.2830  |
| 51 | C  | 6.1350 | -2.1830 | 1.6290  |
| 52 | H  | 5.7900 | -2.2260 | 2.6580  |
| 53 | H  | 6.9640 | -2.8980 | 1.5640  |

|    |   |        |         |         |
|----|---|--------|---------|---------|
| 54 | C | 5.0090 | -2.7080 | 0.6950  |
| 55 | H | 4.6350 | -3.5880 | 1.2230  |
| 56 | H | 5.4550 | -3.1150 | -0.2150 |
| 57 | C | 3.8080 | -1.8810 | 0.1570  |
| 58 | H | 4.1310 | -1.3100 | -0.7080 |
| 59 | H | 3.0700 | -2.5990 | -0.2200 |

Ag<sup>III</sup>(2), S = 1

|    |    |        |         |         |
|----|----|--------|---------|---------|
| 1  | Ag | 4.8380 | 0.0590  | 1.5150  |
| 2  | N  | 4.5030 | 0.8190  | 3.5530  |
| 3  | C  | 5.9090 | 0.8510  | 4.0980  |
| 4  | H  | 5.8100 | 0.9690  | 5.1840  |
| 5  | H  | 6.3780 | 1.7610  | 3.7290  |
| 6  | C  | 6.8230 | -0.3680 | 3.8370  |
| 7  | H  | 6.3250 | -1.2940 | 4.1300  |
| 8  | H  | 7.6290 | -0.2650 | 4.5700  |
| 9  | C  | 7.5590 | -0.5180 | 2.4840  |
| 10 | H  | 8.0540 | 0.4160  | 2.2240  |
| 11 | H  | 8.3500 | -1.2660 | 2.6170  |
| 12 | N  | 6.7420 | -0.9440 | 1.2910  |
| 13 | C  | 7.3510 | -0.6250 | -0.0250 |
| 14 | H  | 6.8360 | -1.2190 | -0.7810 |
| 15 | H  | 8.3940 | -0.9640 | -0.0100 |
| 16 | C  | 7.3530 | 0.8660  | -0.4240 |
| 17 | H  | 7.9840 | 0.9260  | -1.3150 |
| 18 | H  | 7.8780 | 1.4710  | 0.3170  |
| 19 | C  | 6.0190 | 1.5210  | -0.8390 |
| 20 | H  | 6.2630 | 2.4710  | -1.3320 |
| 21 | H  | 5.5120 | 0.9050  | -1.5810 |
| 22 | N  | 5.0270 | 1.8390  | 0.2320  |
| 23 | C  | 3.6070 | 2.0030  | -0.2520 |
| 24 | H  | 3.6540 | 2.7050  | -1.0930 |
| 25 | H  | 3.0530 | 2.5040  | 0.5400  |
| 26 | C  | 2.8430 | 0.7460  | -0.7280 |
| 27 | H  | 2.0050 | 1.1440  | -1.3090 |
| 28 | H  | 3.4270 | 0.1930  | -1.4650 |
| 29 | C  | 2.1730 | -0.1980 | 0.3000  |
| 30 | H  | 1.4660 | -0.8340 | -0.2440 |
| 31 | H  | 1.5870 | 0.3840  | 1.0110  |
| 32 | N  | 3.0710 | -1.1120 | 1.0950  |
| 33 | C  | 2.4720 | -1.6290 | 2.3530  |
| 34 | H  | 3.0710 | -2.4800 | 2.6800  |
| 35 | H  | 1.4720 | -2.0160 | 2.1220  |
| 36 | C  | 2.3210 | -0.6070 | 3.5000  |
| 37 | H  | 1.7200 | -1.1130 | 4.2610  |
| 38 | H  | 1.7060 | 0.2410  | 3.1940  |
| 39 | C  | 3.5890 | -0.1390 | 4.2460  |
| 40 | H  | 3.2580 | 0.3550  | 5.1690  |
| 41 | H  | 4.1860 | -0.9990 | 4.5490  |
| 42 | C  | 3.9000 | 2.1680  | 3.3180  |
| 43 | H  | 3.7410 | 2.6290  | 4.3020  |
| 44 | H  | 2.9080 | 1.9890  | 2.9090  |
| 45 | C  | 4.6510 | 3.2170  | 2.4550  |
| 46 | H  | 5.3480 | 3.7700  | 3.0880  |
| 47 | H  | 3.8790 | 3.9480  | 2.2080  |
| 48 | C  | 5.4820 | 2.9030  | 1.1790  |



|    |   |        |         |         |
|----|---|--------|---------|---------|
| 49 | H | 5.5460 | 3.8390  | 0.6100  |
| 50 | H | 6.5040 | 2.6490  | 1.4520  |
| 51 | C | 6.2180 | -2.3490 | 1.4640  |
| 52 | H | 5.9790 | -2.4450 | 2.5200  |
| 53 | H | 7.0580 | -3.0320 | 1.2890  |
| 54 | C | 5.0240 | -2.9050 | 0.6290  |
| 55 | H | 4.7330 | -3.7960 | 1.1890  |
| 56 | H | 5.4010 | -3.2910 | -0.3200 |
| 57 | C | 3.7370 | -2.1310 | 0.2030  |
| 58 | H | 3.9360 | -1.6150 | -0.7330 |
| 59 | H | 2.9850 | -2.8930 | -0.0360 |

Cr<sup>II</sup>(3), S = 2

|    |    |         |         |         |
|----|----|---------|---------|---------|
| 1  | Cr | -0.0100 | 0.0710  | -0.0140 |
| 2  | N  | 0.6590  | -1.7870 | -0.8630 |
| 3  | C  | 2.1240  | -2.1350 | -0.9270 |
| 4  | H  | 2.2320  | -2.9830 | -1.6090 |
| 5  | H  | 2.4330  | -2.4910 | 0.0540  |
| 6  | C  | 3.0460  | -0.9930 | -1.3510 |
| 7  | H  | 2.6210  | -0.4520 | -2.2010 |
| 8  | H  | 3.9510  | -1.4590 | -1.7430 |
| 9  | C  | 3.4480  | -0.0310 | -0.2080 |
| 10 | H  | 4.5380  | 0.0480  | -0.1880 |
| 11 | H  | 3.1880  | -0.4720 | 0.7580  |
| 12 | N  | 1.4590  | 1.6570  | -0.1830 |
| 13 | C  | 1.1750  | 2.6270  | 0.9250  |
| 14 | H  | 0.1690  | 3.0260  | 0.7890  |
| 15 | H  | 1.8590  | 3.4750  | 0.8360  |
| 16 | C  | 1.2940  | 2.0010  | 2.3180  |
| 17 | H  | 1.4410  | 2.8180  | 3.0290  |
| 18 | H  | 2.2010  | 1.3980  | 2.3940  |
| 19 | C  | 0.0680  | 1.2410  | 2.8360  |
| 20 | H  | 0.2410  | 0.9760  | 3.8840  |
| 21 | H  | -0.7910 | 1.9130  | 2.8200  |
| 22 | N  | -0.3590 | -0.0070 | 2.1090  |
| 23 | C  | -1.7010 | -0.4110 | 2.6630  |
| 24 | H  | -1.7120 | -0.1450 | 3.7240  |
| 25 | H  | -1.7750 | -1.4960 | 2.6190  |
| 26 | C  | -2.9110 | 0.1930  | 1.9520  |
| 27 | H  | -3.7320 | 0.1650  | 2.6700  |
| 28 | H  | -2.7520 | 1.2560  | 1.7530  |
| 29 | C  | -3.3540 | -0.5650 | 0.6780  |
| 30 | H  | -4.4210 | -0.7850 | 0.7590  |
| 31 | H  | -2.8740 | -1.5470 | 0.6450  |
| 32 | N  | -1.8040 | 0.4870  | -1.1420 |
| 33 | C  | -1.5840 | -0.0770 | -2.5150 |
| 34 | H  | -0.7250 | 0.4220  | -2.9640 |
| 35 | H  | -2.4480 | 0.1700  | -3.1400 |
| 36 | C  | -1.3540 | -1.5910 | -2.5140 |
| 37 | H  | -1.5740 | -1.9530 | -3.5220 |
| 38 | H  | -2.0820 | -2.0930 | -1.8730 |
| 39 | C  | 0.0740  | -2.0670 | -2.2240 |
| 40 | H  | 0.1220  | -3.1480 | -2.3940 |
| 41 | H  | 0.7480  | -1.6050 | -2.9470 |
| 42 | C  | -0.0310 | -2.6290 | 0.1780  |
| 43 | H  | 0.0880  | -3.6860 | -0.0850 |

|    |   |         |         |         |
|----|---|---------|---------|---------|
| 44 | H | -1.0980 | -2.4210 | 0.0930  |
| 45 | C | 0.4070  | -2.4780 | 1.6570  |
| 46 | H | 1.3360  | -3.0280 | 1.8200  |
| 47 | H | -0.3400 | -3.0380 | 2.2230  |
| 48 | C | 0.6470  | -1.1050 | 2.3370  |
| 49 | H | 0.7290  | -1.2910 | 3.4140  |
| 50 | H | 1.6160  | -0.7130 | 2.0300  |
| 51 | C | 1.0120  | 2.1940  | -1.5200 |
| 52 | H | 1.2390  | 1.4080  | -2.2430 |
| 53 | H | 1.6550  | 3.0380  | -1.7890 |
| 54 | C | -0.4390 | 2.6840  | -1.7160 |
| 55 | H | -0.5500 | 2.7620  | -2.8000 |
| 56 | H | -0.5160 | 3.7140  | -1.3600 |
| 57 | C | -1.6900 | 1.9920  | -1.1340 |
| 58 | H | -1.8280 | 2.2910  | -0.0930 |
| 59 | H | -2.5440 | 2.4080  | -1.6780 |
| 60 | C | 2.9590  | 1.4100  | -0.2690 |
| 61 | H | 3.3180  | 1.8740  | -1.1890 |
| 62 | H | 3.4270  | 1.9610  | 0.5460  |
| 63 | C | -3.2060 | 0.1330  | -0.6680 |
| 64 | H | -3.7940 | 1.0530  | -0.6610 |
| 65 | H | -3.6560 | -0.5030 | -1.4290 |

Cr<sup>II</sup>(4), S = 2

|     |          |          |          |
|-----|----------|----------|----------|
| C3  | -3.44589 | 0.22323  | 0.53819  |
| C6  | -3.46729 | 1.70227  | 0.86285  |
| C9  | -2.69046 | 2.60572  | -0.11149 |
| C13 | 0.36055  | 2.78536  | -1.15280 |
| C16 | 1.59171  | 2.01825  | -1.69028 |
| C19 | 1.37852  | 1.17445  | -2.96646 |
| C23 | 0.45346  | -2.47424 | -1.97782 |
| C26 | 1.82035  | -3.03346 | -1.59765 |
| C29 | 2.29465  | -3.01543 | -0.14582 |
| C33 | 1.38160  | -0.99879 | 2.29111  |
| C36 | 0.29579  | -2.07793 | 2.14902  |
| C39 | -2.37944 | -1.88163 | 0.10025  |
| C42 | -2.86092 | -1.90387 | -1.36938 |
| C45 | -2.38853 | -0.78255 | -2.31001 |
| C48 | 2.29802  | 2.94124  | 1.35224  |
| C51 | 2.80255  | 1.70850  | 2.10657  |
| C54 | 3.09001  | 0.44035  | 1.31284  |
| C57 | -1.39973 | 3.17782  | 0.45608  |
| C60 | 2.84820  | -1.70952 | 0.42689  |
| C63 | 1.37919  | -0.34238 | -2.76656 |
| C66 | -1.07044 | -1.73252 | 2.73888  |
| C69 | -1.80497 | -0.52829 | 2.15032  |
| C72 | 0.79257  | 3.14410  | 1.27152  |
| C75 | -1.00013 | -0.79220 | -2.93515 |
| Cr1 | -0.04152 | 0.14634  | -0.08252 |
| H4  | -4.14802 | -0.30355 | 1.19123  |
| H5  | -3.81867 | 0.09666  | -0.46982 |
| H7  | -3.15058 | 1.89067  | 1.89156  |
| H8  | -4.52365 | 1.97976  | 0.83696  |
| H10 | -2.52916 | 2.11089  | -1.07251 |
| H11 | -3.31737 | 3.46777  | -0.34931 |
| H14 | -0.49385 | 2.60940  | -1.80765 |

Electronic Supplementary Information for Dalton Transactions  
This journal is © The Royal Society of Chemistry 2008

|     |          |          |          |
|-----|----------|----------|----------|
| H15 | 0.54978  | 3.86316  | -1.18763 |
| H17 | 2.01486  | 1.38133  | -0.90999 |
| H18 | 2.37736  | 2.74695  | -1.89018 |
| H20 | 0.49976  | 1.52040  | -3.51255 |
| H21 | 2.21362  | 1.35942  | -3.64593 |
| H24 | 0.25165  | -2.84626 | -2.98452 |
| H25 | -0.31213 | -2.90298 | -1.33568 |
| H27 | 1.74606  | -4.08723 | -1.88205 |
| H28 | 2.60139  | -2.63486 | -2.24795 |
| H30 | 3.16456  | -3.67881 | -0.11721 |
| H31 | 1.57188  | -3.49889 | 0.50547  |
| H34 | 0.96330  | -0.10765 | 2.75962  |
| H35 | 2.17962  | -1.34467 | 2.95796  |
| H37 | 0.63977  | -3.00571 | 2.60838  |
| H38 | 0.17045  | -2.31710 | 1.09636  |
| H40 | -3.13552 | -2.38104 | 0.71374  |
| H41 | -1.47010 | -2.46374 | 0.20847  |
| H43 | -3.95091 | -1.88043 | -1.37187 |
| H44 | -2.60441 | -2.88119 | -1.78596 |
| H46 | -3.07122 | -0.77453 | -3.16409 |
| H47 | -2.53603 | 0.18519  | -1.83512 |
| H49 | 2.63780  | 3.81157  | 1.91903  |
| H50 | 2.78807  | 3.03886  | 0.38397  |
| H52 | 2.17524  | 1.51850  | 2.98007  |
| H53 | 3.77551  | 1.97481  | 2.52575  |
| H55 | 3.55871  | 0.71304  | 0.36650  |
| H56 | 3.84702  | -0.11542 | 1.87308  |
| H58 | -1.52762 | 3.29571  | 1.53068  |
| H59 | -1.24203 | 4.18325  | 0.05794  |
| H61 | 3.47943  | -1.25692 | -0.33930 |
| H62 | 3.52112  | -1.98675 | 1.24439  |
| H64 | 1.45099  | -0.82893 | -3.74463 |
| H65 | 2.28159  | -0.60519 | -2.21927 |
| H67 | -1.70852 | -2.61586 | 2.68173  |
| H68 | -0.96862 | -1.52092 | 3.80766  |
| H70 | -1.25394 | 0.39442  | 2.36177  |
| H71 | -2.74637 | -0.43665 | 2.69646  |
| H73 | 0.36441  | 2.90355  | 2.24667  |
| H74 | 0.62116  | 4.21365  | 1.11257  |
| H76 | -0.89166 | 0.16076  | -3.44655 |
| H77 | -0.94208 | -1.55901 | -3.71021 |
| N2  | -2.12588 | -0.50976 | 0.65881  |
| N12 | -0.08323 | 2.44191  | 0.24819  |
| N22 | 0.21010  | -0.96833 | -2.03729 |
| N32 | 1.99910  | -0.57138 | 0.99010  |
